# Supplementary material for: Development of hyperbranched poly-(amine-ester) based aldehyde/chrome-free tanning agents for sustainable leather resource recycling
Source: Royal Society of Chemistry journal article supplement (doi:10.1039/d1gc01538a), 2021-01-01
Supplement: d1gc01538a1.pdf [file d1gc01538a1.pdf]

## Supplementary Information

### Development of Hyperbranched Poly (Amine-Ester) based Aldehyde/Chrome-free Tanning Agent for Sustainable Leather Resources Recycling

Xinhua Liu <sup>a, b, c\*</sup>, Youyou Wang <sup>a, b</sup>, Xuechuan Wang <sup>c</sup>, Huie Jiang <sup>a, b\*</sup>

<sup>a</sup> College of Bioresources Chemical and Materials Engineering, Shaanxi University of Science & Technology, Wei Yang District, Xi'an 710021, Shaanxi, China

<sup>b</sup> National Demonstration Center for Experimental Light Chemistry Engineering Education, Shaanxi University of Science & Technology, Weiyang District, Xi'an 710021, Shaanxi, China

<sup>c</sup> Institute of Biomass & Functional Materials, Shaanxi University of Science & Technology, Weiyang District, Xi'an 710021, Shaanxi, China

\*Corresponding Author:

Dr. Xinhua Liu, Email: [liuxinhua@sust.edu.cn](mailto:liuxinhua@sust.edu.cn)

Dr. Huie Jang, Email: [jianghuie@sust.edu.cn](mailto:jianghuie@sust.edu.cn)

---

|                                                                                                                                                                                        |     |
|----------------------------------------------------------------------------------------------------------------------------------------------------------------------------------------|-----|
| 1. (1) Dendritic unit (D), linear unit (L), and terminal units (T) of HHBPs respectively. (2) The <sup>1</sup> H NMR spectrum of HHPBs (Deuterated chloroform) ( <b>Fig. S1</b> )..... | S4  |
| 2. <sup>13</sup> C NMR spectrum of the EHBP (s) ( <b>Fig. S2</b> ).....                                                                                                                | S4  |
| 3. Theoretical relative molecular mass and theoretical & measured epoxy value of EHBP (s) ( <b>Table S1</b> ).....                                                                     | S7  |
| 4. Molecular weight and its distribution of EHBP (s) ( <b>Table S2</b> ).....                                                                                                          | S7  |
| 5. Tanning processes ( <b>Table S3</b> ).....                                                                                                                                          | S8  |
| 6. The optical photo (a) of HHBP-III tanned leather, and FESEM images of the cross-sectional (samples tanned with 14% HHBP-III, 100 μm ×500; 500 nm ×70.0k) ( <b>Fig. S3</b> ).....    | S8  |
| 7. FTIR spectra of leathers with EHBP (s), HHBP-III treated and pickled skin ( <b>Fig. S4</b> ).....                                                                                   | S9  |
| 8. Data collected from TG and DTG curves ( <b>Table S4</b> ).....                                                                                                                      | S10 |
| 9. SEM images of grain surface (500 μm: × 200) of untanned leather (Control, a), EHBP-I (b), EHBP-II (c) and EHBP-III tanned leather (d) ( <b>Fig. S5</b> ).....                       | S11 |
| 10. Pores size distribution measured by MIP ( <b>Fig. S6</b> ).....                                                                                                                    | S11 |

---

11.The value of BOD<sub>5</sub> and COD of EHBPs tanning agent (**Table S5**).....S12

12.The relationship between the value of BOD<sub>5</sub>/COD and the biodegradability of organic tanning agents (**Table S6**).....S12

## $^1\text{H}$ NMR spectrum and the degree of branching (DB) of HHBPs

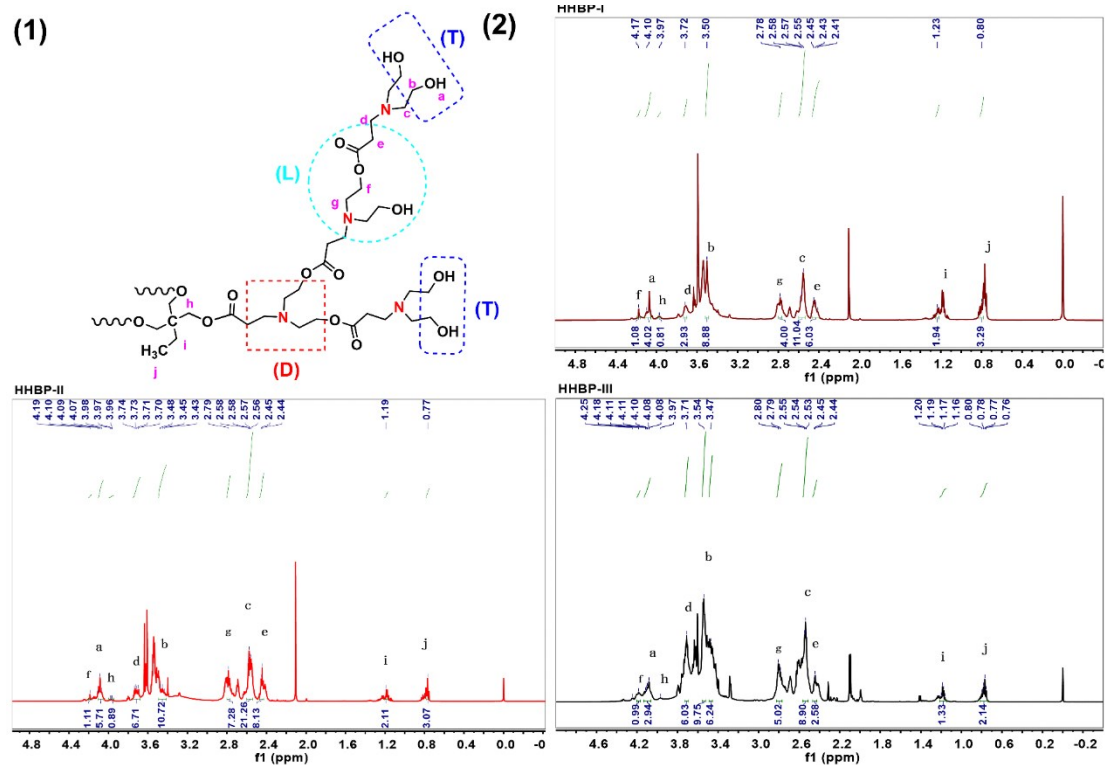

**Fig. S1.** (1) Dendritic unit (D), linear unit (L), and terminal units (T) of HHBPs respectively. (2) The  $^1\text{H}$  NMR spectrum of HHPBs (Deuterated chloroform).

**Fig. S1. (2)** shows that the spectra of HHBP-I, HHBP-II and HHBP-III, which signal appeared at  $\delta_{\text{H}}$  4.20 ppm attachment is attributed to hydroxyl group of  $\text{AB}_2$  monomer ( $-\text{CH}_2\text{CH}_2\text{OH}$ ) (a). In addition, the signal at  $\delta_{\text{H}}$  3.49 ppm (c) belong to the  $-\text{CH}_2$  of  $\text{AB}_2$  monomer ( $-\text{CH}_2\text{OH}$ ), and the signal at  $\delta_{\text{H}}$  2.57 ppm belong to another  $-\text{CH}_2$  of  $\text{AB}_2$  monomer ( $-\text{NCH}_2-$ ) (b). While the methylene group linked to the ester group appears at  $\delta_{\text{H}}$  2.49 ppm (e), and another methylene group linked to the N atom appears at  $\delta_{\text{H}}$  3.71 ppm (d), and the signal appeared at  $\delta_{\text{H}}$  0.80 ppm is attributed to the methyl (j). Furthermore, the signal appeared around  $\delta_{\text{H}}$  1.23 ppm is attributed to the methylene groups on the  $(\text{CH}_3-\text{CH}_2-\text{C}-)$  structure in TMP (i). The signal of the methylene structure ( $-\text{CH}_2-$ ) between one  $\text{AB}_2$  monomer and another  $\text{AB}_2$  monomer appears around  $\delta_{\text{H}}$  4.20 ppm (f) and  $\delta_{\text{H}}$  2.70 ppm (g), respectively. As for HHBP-I, the integral area of different group is  $\text{H}_a$  (4.02),  $\text{H}_b$  (8.88),  $\text{H}_c$  (11.04),

---

H<sub>d</sub> (2.93), H<sub>e</sub> (6.03), H<sub>f</sub> (1.08), H<sub>g</sub> (4.00), respectively.

In a hyperbranched structure based on a branching multiplicity of 2 (AB<sub>2</sub> monomer), three different building units are present: dendritic unit (D), linear units (L), and end groups (“terminal units”, T), as well as precisely one single focal moiety <sup>1</sup>(**Fig. S1. (1)**). Perfectly branched dendrimers consist only of dendritic and terminal units, the degree of branching has been normalized to 1 (i.e., 100%), whereas no linear polymers. Combined with the analysis of nuclear magnetic resonance spectrum (**Fig. S1**), it can be found that a linear unit (L) contains 2H<sub>e</sub>,2H<sub>d</sub>,3H<sub>b</sub>,3H<sub>c</sub>,1H<sub>f</sub>,1H<sub>g</sub>; a dendritic unit (D) contains 3H<sub>e</sub>,3H<sub>d</sub>, 2H<sub>f</sub>,2H<sub>g</sub>; a terminal units (T) contains 1H<sub>e</sub>,1H<sub>d</sub>, 2H<sub>b</sub>,2H<sub>c</sub>. Therefore, according to equation by Frechet <sup>2</sup> the degree of branching of HHBP-I can be calculated, which is 0.5091. Similarly, HHBP-II and HHBP-III can be calculated in the same method, which is 0.5111 and 0.5874 respectively.

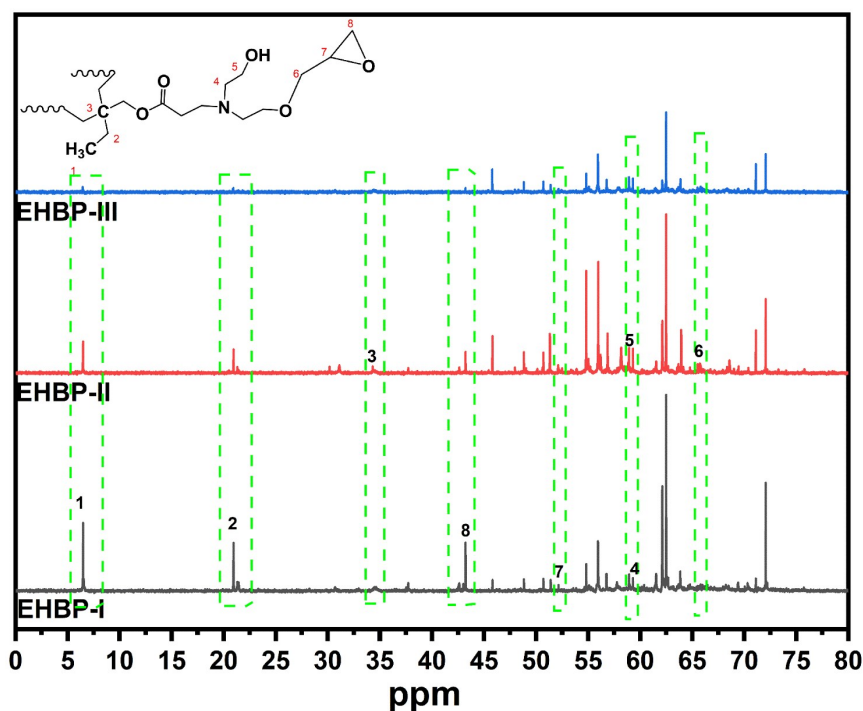

**Fig. S2.**  $^{13}\text{C}$  NMR spectrum of the EHBP.

### $^{13}\text{C}$ NMR spectrum of the EHBP

As depicted in the  $^{13}\text{C}$  NMR spectrum of EHBP in **Fig. S2**, the peak at  $\delta_{\text{C}}$ : 6.5 ppm belongs to methyl proton, and the  $\delta_{\text{C}}$ : 21.0 ppm attributing to the methylene proton connected thereto. The core carbon proton signal peak of TMP appeared in  $\delta_{\text{C}}$ : 34.5 ppm. In addition, the protons of methylene groups attached to hydroxyl groups ( $-\text{NCH}_2\text{CH}_2\text{OH}$ ) belonged to the signals of  $\delta_{\text{C}}$ : 59.8 and 59.3 ppm, respectively, which also proved that the polymer still contains hydroxyl groups after epoxy modification. What's more, the chemical shifts separately appeared at  $\delta_{\text{C}}$ : 65.7, 52.2 and 43.2 ppm, these were attributed to the methine connected to epoxy groups, as well as the methylene and methine groups on the epoxy group<sup>3</sup>.

### Relative molecular mass and epoxy value of EHBP

#### Table S1

Theoretical relative molecular mass and theoretical & measured epoxy value of EHBP

| Samples                                         | EHBP-I | EHBP-II | EHBP-III |
|-------------------------------------------------|--------|---------|----------|
| Theoretical relative molecular mass             | 947    | 2237    | 4817     |
| Theoretical monomolecular epoxy group/(mol/mol) | 6      | 12      | 24       |
| Theoretical epoxy value/(mol/100 g)             | 0.6336 | 0.5364  | 0.4982   |
| Measured epoxy value/(mol/100 g)                | 0.5305 | 0.4397  | 0.2845   |
| Measured epoxy value/(mol/mol)                  | 5      | 10      | 14       |

### Molecular weight of EHBPs

The molecular weight of EHBPs were determined, and the results are presented in **Table S2**.

**Table S2**

Molecular weight and its distribution of EHBPs.

| Samples  | $M_w$   | $M_n$   | $M_p$   | $M_z$   | PDI  |
|----------|---------|---------|---------|---------|------|
| EHBP-I   | 27817   | 25573   | 25555   | 29827   | 1.09 |
| EHBP-II  | 193703  | 103086  | 134424  | 358261  | 1.88 |
| EHBP-III | 1290263 | 1050585 | 1742805 | 1531346 | 1.23 |

Note:  $M_w$ —Weight-average molecular weight  
 $M_n$ —Number-average molecular weight  
 $M_p$ —Peak molecular weight  
 $M_z$ —Mass-average molecular weight  
PDI—Polymer dispersity index

### Tanning process

The process recipe for wet-white leather was shown in **Table S3**.

**Table S3**

Tanning processes.

| Process      | Chemicals              | Offer/% | T/°C | t/min | Remarks                                                                                                                                            |
|--------------|------------------------|---------|------|-------|----------------------------------------------------------------------------------------------------------------------------------------------------|
| Rewetting    | Water                  | 150     | 25   | 20    | Drain                                                                                                                                              |
|              | Salt                   | 10      |      |       |                                                                                                                                                    |
| Tanning      | Water                  | 50      | 25   | 4-5   | Adjust the pH of the bath liquid to 6.5±, cast skin. Mechanical action for 2h, add hexamethylenetetramine, and continue to rotate for 2 - 3 hours. |
|              | Salt                   | 5       |      |       |                                                                                                                                                    |
|              | SDS                    | 1       |      |       |                                                                                                                                                    |
|              | EHBPs/HHBP-III         | X       |      |       |                                                                                                                                                    |
|              | Hexamethylenetetramine | 1       |      |       |                                                                                                                                                    |
| Basification | Sodium bicarbonate     | 1×3     | 30   | 20×3  | Slowly adjust the pH of the bath liquid to 8.5± and stop mechanical action overnight.                                                              |

Note:①The values of X for EHBPs (EHBP-I, EHBP-II, EHBP-III) are 10%, 12%, 14%, respectively; as for HHBP-III, which is 14%.

②The squeezed sheep pickled skin is weighed 200% as the basis for the dosage.

### HHBP-III treated leather analysis

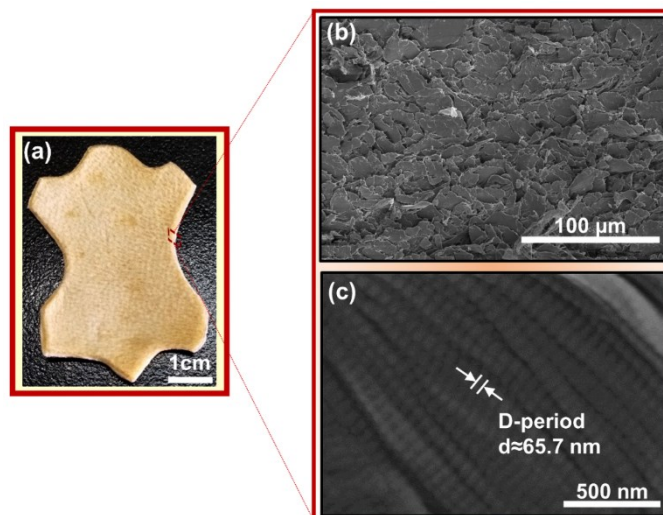



**Fig. S3.** The optical photo (a) of HHBP-III tanned leather, and FESEM images of the cross-sectional (samples tanned with 14% HHBP-III, 100  $\mu\text{m}$   $\times$  500; 500 nm  $\times$  70.0k).

The optical photo and the microstructure images of the 14% HHBP-III tanned leather were shown in Fig. S3. Although the Ts of HHBP-III tanned leather could reach 67.1°C, its overall macroscopic morphology was similar to those of pickled skin (control). The microstructure of collagen fibers looked very sticky and their dispersibility were poor. Therefore, it was illustrated that the epoxy groups in EHBP's tanning agent play the role of tanning and dispersing fiber, but not hydroxyl groups.

#### FT-IR analyses of different treated leather

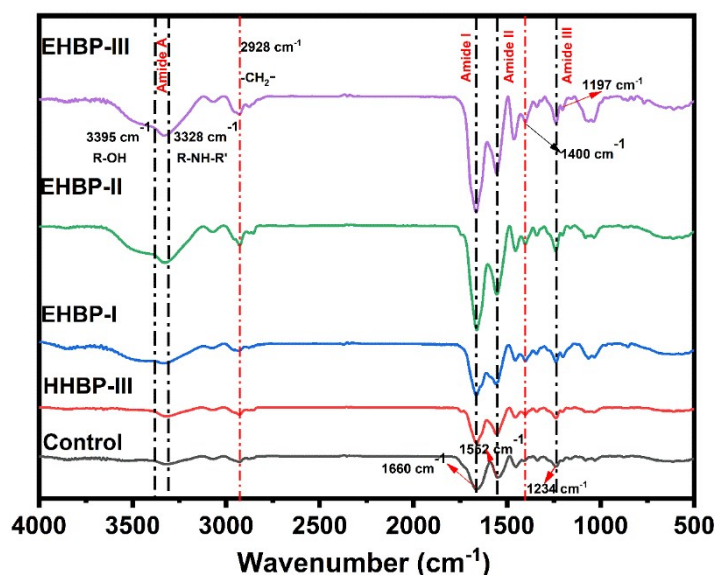

**Fig. S4.** FTIR spectra of leathers with EHBP, HHBP-III treated and pickled skin.

Sampling from different treated leather by filing, and the samples were placed in a drying oven with a vacuum of -0.08 MPa and a temperature of 25°C for 72 hours to remove moisture from the leather, and then the Fourier Transform Infrared Spectrometer (Vertex70, Brooke Germany Ltd) was used for chemical bonding identification. As demonstrated in Fig. S4, the characteristic absorption peak of protein amide strip was mainly presented in

the pickled skin (Control), of which strong peaks at  $1660\text{ cm}^{-1}$  was caused by the amide I (stretching vibration of carbonyl in carboxyl)<sup>4</sup>, and  $1552\text{ cm}^{-1}$  was the characteristic absorption peak of amide II band (C-N-H bending vibration), then  $1234\text{ cm}^{-1}$  was the characteristic absorption peak of amide III band (C-N stretching vibration)<sup>5, 6</sup>. Furthermore, peaks at  $2928\text{ cm}^{-1}$  was the symmetric and antisymmetric stretching vibrational absorption of methylene ( $-\text{CH}_2-$ ) groups<sup>7</sup>. A new signal peak appeared in  $1197\text{ cm}^{-1}$  and became stronger gradually, which may be caused by the C-O-C bond in the ester group. What's more, the stretching vibration absorption peaks of secondary amine N-H and O-H were at  $3328\text{ cm}^{-1}$  and  $3395\text{ cm}^{-1}$ , separately, and the intensity also enhanced gradually with the tanned leather of EHBP-I, EHBP-II and EHBP-III. To sum up, it was indicated that the epoxy group on EHBPs mainly reacts with the active amino group on collagen to stabilize the structure of collagen fiber, which enhanced the proton signals of amide bond,  $-\text{NH}-\text{C}-$ ,  $-\text{CH}_2-$ , and  $-\text{OH}$  groups of collagen, but it could be seen that the main features of the modified collagen absorption peak had no obvious displacement, showing that the triple-helix structure of collagen was not destroyed by the EHBPs.

## TG-DTG

**Table S4**

Data collected from TG and DTG curves

| Samples  | $T_d$ ( $^{\circ}\text{C}$ ) | Residual amount of $T_d$ (%) | Residual amount of $600^{\circ}\text{C}$ (%) |
|----------|------------------------------|------------------------------|----------------------------------------------|
| Control  | 312.5                        | 61.3                         | 22.9                                         |
| EHBP-I   | 319.8                        | 62.6                         | 27.5                                         |
| EHBP-II  | 323.8                        | 64.2                         | 29.9                                         |
| EHBP-III | 331.0                        | 62.7                         | 26.6                                         |

## SEM grain surface of the grain of EHBPs tanned leather and pickled skin

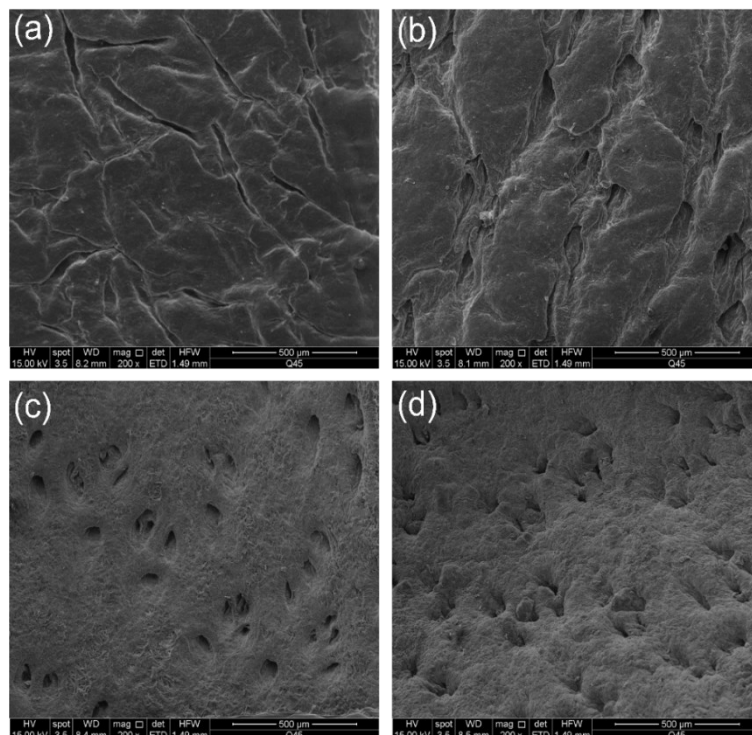

**Fig. S5.** SEM images of grain surface (500  $\mu\text{m}$ :  $\times$  200) of untanned leather (Control, a), EHBP-I (b), EHBP-II (c) and EHBP-III tanned leather (d).

### Pores structure of EHBPs tanned leather and pickled skin

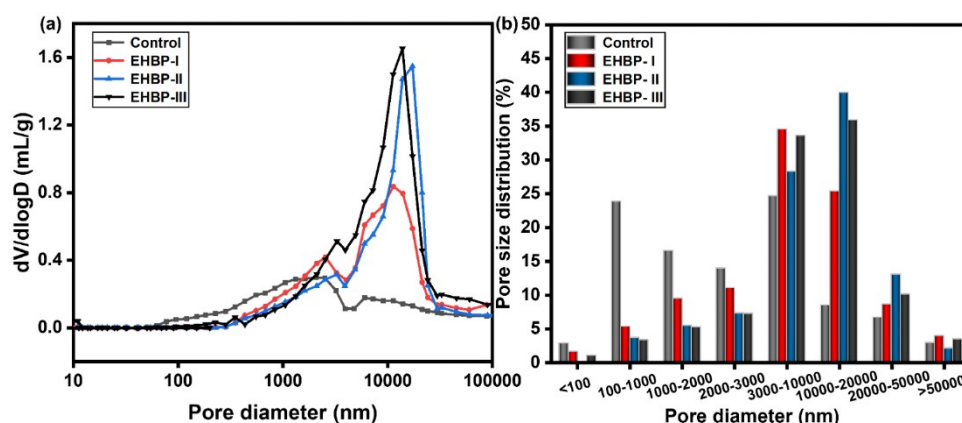

**Fig. S6.** Pores size distribution measured by MIP.

### EHBPs bio-degradation analysis

The biodegradability study of the EHBPs compounds alone to further prove its environmental impact. Similarly, the standard method (HJ/T 399 2007) was used to analyze the chemical oxygen demand (COD) and a BOD tester (BOD TrakII HACH) was used to evaluate biochemical oxygen demand (BOD), which

---

corresponding data were listed in the following table:

**Table S5**

The value of BOD<sub>5</sub> and COD of EHBP's tanning agent

| Samples  | BOD <sub>5</sub> (mg/L) | COD <sub>Cr</sub> (mg/L) | BOD <sub>5</sub> /COD |
|----------|-------------------------|--------------------------|-----------------------|
| EHBP-I   | 10333.3±                | 27630.3±                 | 0.37                  |
| EHBP-II  | 10666.7±                | 29580.5±                 | 0.36                  |
| EHBP-III | 12583.3±                | 38161.2±                 | 0.33                  |

### Environmental impact assessment

**Table S6**

The relationship between the value of BOD<sub>5</sub>/COD and the biodegradability of organic tanning agents<sup>8</sup>

|                       |           |          |           |                |
|-----------------------|-----------|----------|-----------|----------------|
| BOD <sub>5</sub> /COD | >0.45     | 0.3-0.45 | 0.25-0.30 | <0.25          |
| Biodegradability      | Very easy | Easy     | Difficult | More difficult |

---

## Reference

- S1. D. Wilms, S. E. Stiriba and H. Frey, *Accounts of Chemical Research*, 2010, **43**, 129-141.
- S2. C. J. Hawker, R. Lee and J. M. J. Frechet, *Journal of the American Chemical Society*, 1991, **113**, 4583-4588.
- S3. L. Ding, J. Song, D. Huang, J. Lei, X. Li and J. Sun, *J Hazard Mater*, 2020, **406**, 124708-124708.
- S4. D. Y. Hao, X. C. Wang, X. H. Liu, X. Zhu, S. W. Sun, J. Li and O. Yue, *J Hazard Mater*, 2020, **399**.
- S5. B. de Campos Vidal and M. L. S. Mello, *Micron*, 2011, **42**, 283-289.
- S6. Y. X. Zhou, J. Z. Ma, D. G. Gao, W. B. Li, J. B. Shi and H. J. Ren, *J Clean Prod*, 2018, **201**, 668-677.
- S7. N. Chen, Q. Lin, J. Rao and Q. J. I. C. Zeng, *Ind Crop Prod*, 2013, **50**, 44-49.
- S8. X. Wu, X. Qiang, D. Liu, L. Yu and X. Wang, *J Clean Prod*, 2020, **270**, 122399.
